# Supplementary material for: Evaluation of Anti-Tumor Effects of Whole-Body Low-Dose Irradiation in Metastatic Mouse Models
Source: PubMed Central journal article supplement (PMC7281283; doi:10.3390/cancers12051126), 2020-04-30

Supplementary Materials

## Evaluation of Anti-Tumor Effects of Whole-Body Low-Dose Irradiation in Metastatic Mouse Models

Kyung-Hee Song, Seung-Youn Jung, Jeong-In Park, Jiyeon Ahn, Jong-Kuk Park, Sang-Gu Hwang, Eun-Ho Kim, Seon Young Nam, Seungwoo Park, Hunjoo Ha and Jie-Young Song

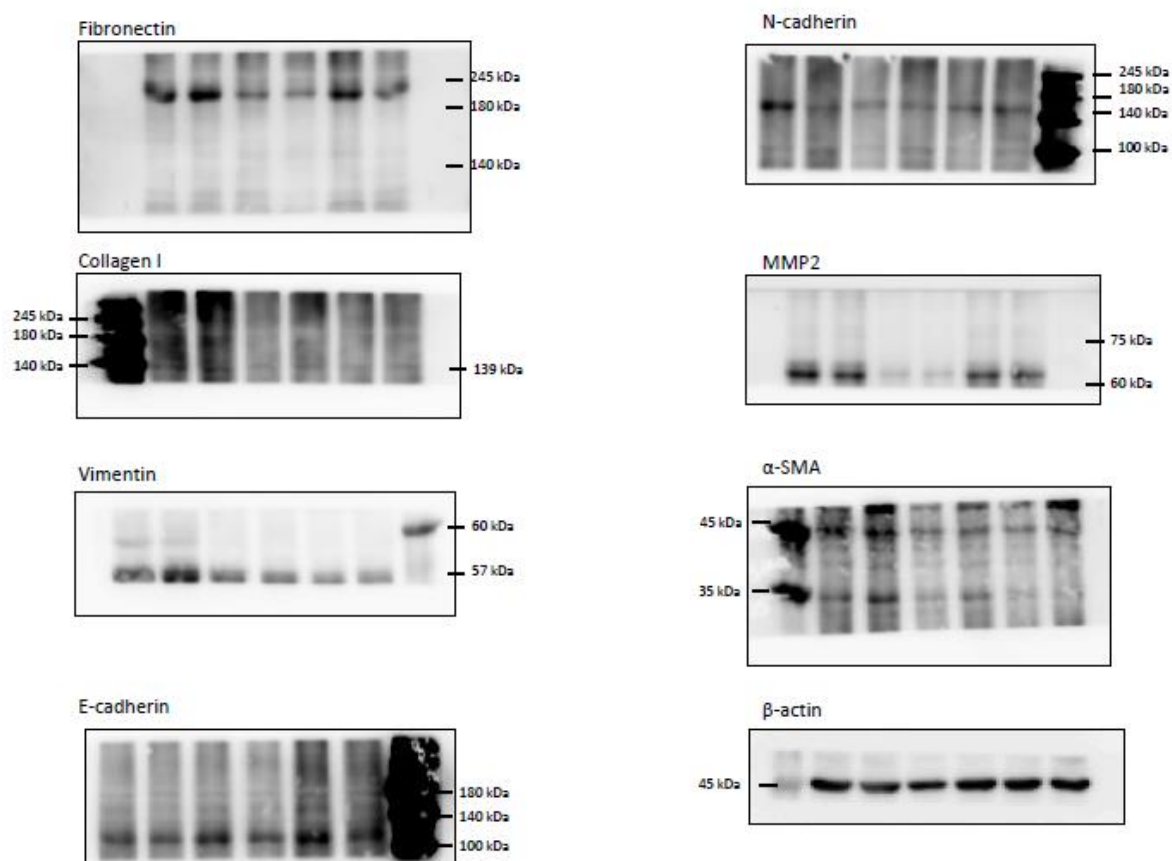

Figure S1. Detailed information about western blot of Figure 1E.

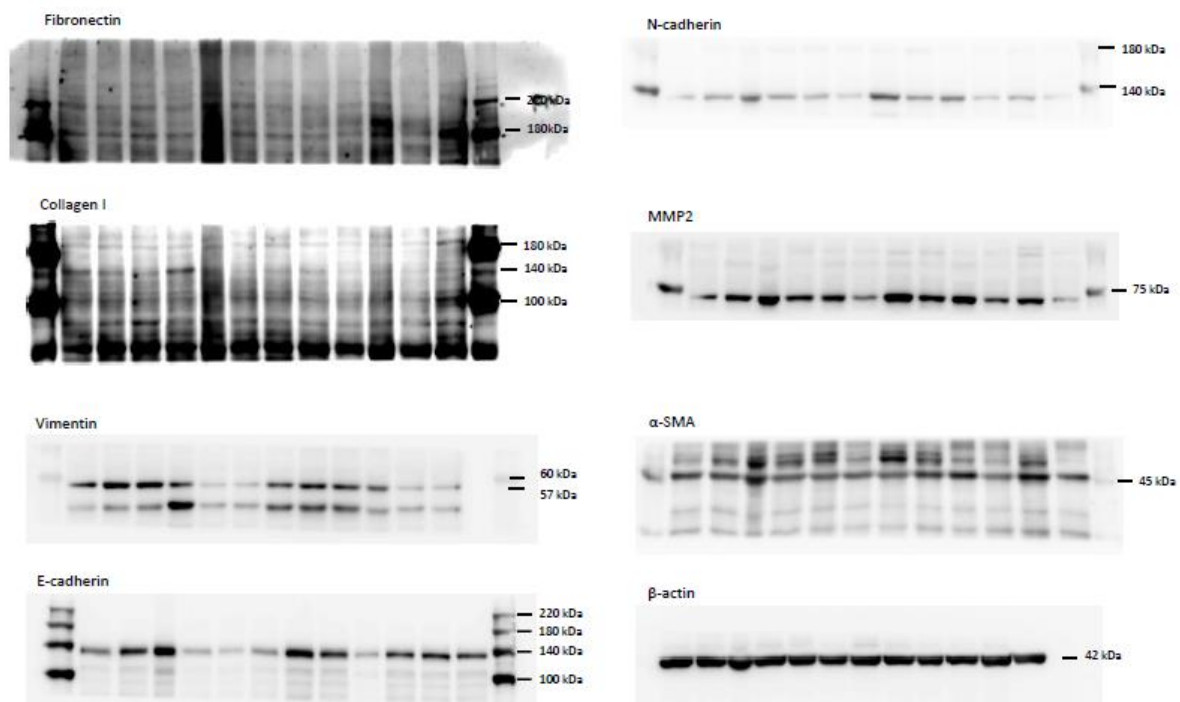

Figure S2. Detailed information about western blot of Figure 4A.

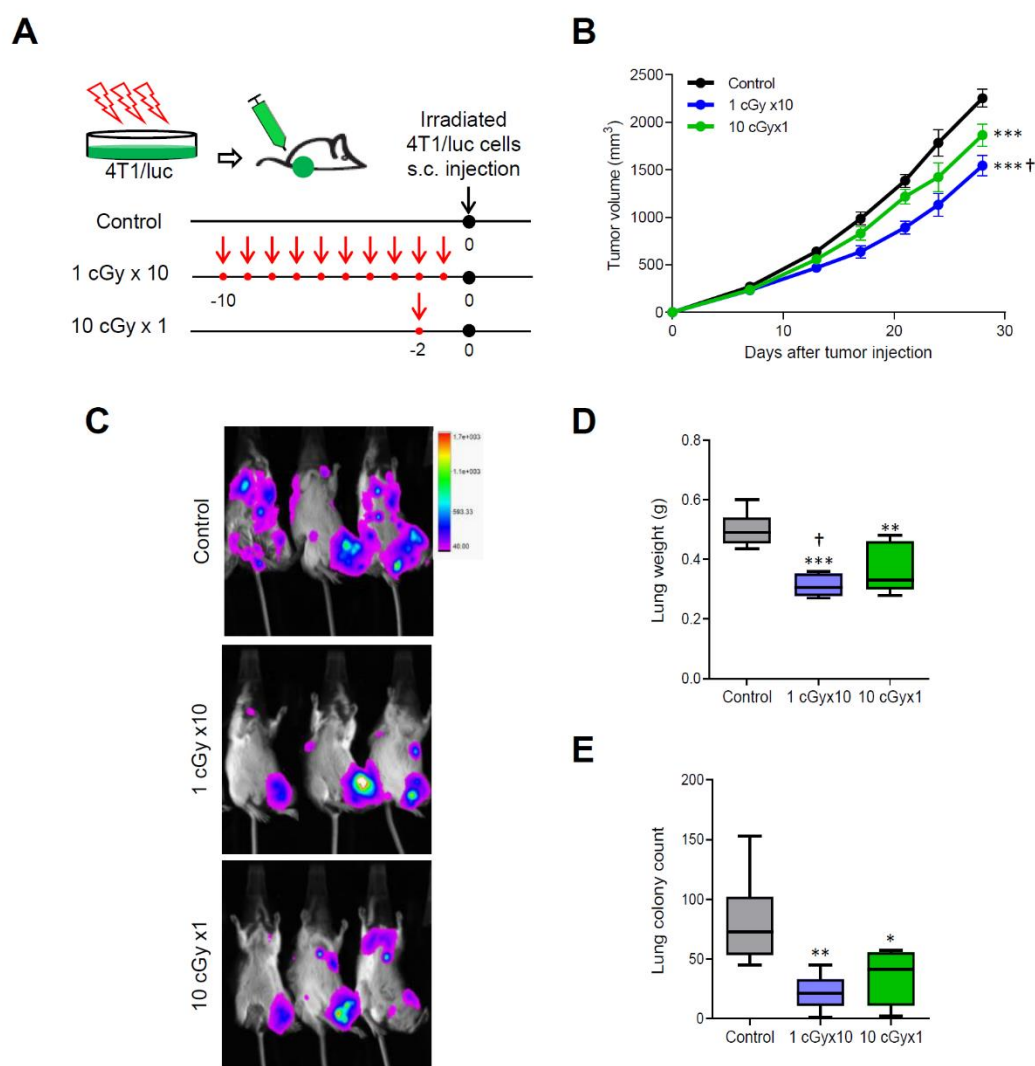

**Figure S3.** Reduction of metastatic potentials of LDI-treated 4T1 cells. (A) Experimental scheme of directly LDI exposure to 4T1/luc cells. 4T1/luc cells were either irradiated with 10 cGy at once or 1 cGy for 10 times (accumulative dose of 10 cGy), and then were s.c. injected into right thigh. (B) Tumor growth was measured after LDI-treated 4T1/luc transplantation. (C) Bioluminescent intensity of representative mice was monitored on week 34 after injection of 4T1/luc cells. (D) Lung weights. (E) The number of metastatic foci were counted and calculated in each group. Data represent means  $\pm$  SEM of 6-7 mice experiment. \*  $p < 0.05$ , \*\*  $p < 0.01$ , \*\*\*  $p < 0.001$  vs. control; †  $p < 0.05$  vs. 10 cGy  $\times$  1.

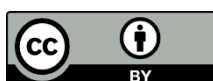

Supplement: cancers-12-01126-s001.pdf [file cancers-12-01126-s001.pdf]
